# Supplementary material
Source: publisher site journal article supplement (https://www.dovepress.com/get_supplementary_file.php?f=341085.docx)
Supplement: Supplementary file 1 [file get_supplementary_file.php]

Supplementary material.

**Table S1: Study overview and findings**

| **First author and country** | **Assessment of religious denomination** | **Assessment of religiosity** | **Assessment of religious attendance** | **Assessment of cancer screening utilization** | **Study type** | **Sample characteristics** | **Sample Size** | **Age** | **Females in total sample** | **Results for religious denomination** | **Results for religiosity** | **Results for religious attendance** |
| --- | --- | --- | --- | --- | --- | --- | --- | --- | --- | --- | --- | --- |
| **Azaiza (2010)**1  **Palestine** | Christian; Muslim | rated on a four-point scale |  | (1) ever undergone a mammography or a clinical breast examination (2) performed a self-breast examination during the last three months | cross-sectional | Palestinian women in the West Bank | n=397 | M=41.7 SD=8.9 30-65 | 100.0% | Regarding religious denomination, logistic regression revealed that Christian women had significantly higher chances of having performed a self-breast examination (OR=2.9, 95% CI: 1.5-5.7). | Religiosity was negatively associated with all types of cancer screenings (e.g., mammography: OR=0.6, 95% CI: 0.5-0.8). |  |
| **Benjamins (2004)**2  **United States** | Catholic; Protestant; Jewish; none | rated on a three-point scale |  | (1) having undergone a cholesterol screening, mammogram (only women), pap smear (only women) or prostate screening (only men) during the last two years (2) performing a breast exam (only women) monthly | longitudinal (two waves, 1993-1995) | Assets and Health Dynamics Among the Oldest Old survey | n=6,055 | M=77.3 SD not reported 70-103 | 62% | Logistic regression showed that Jewish individuals had an increased screening probability among all types (e.g., cholesterol screening: OR=4.6, p<.001). Protestants had increased odds among cholesterol screenings (OR=1.8, p<.01) and prostate screenings (OR=2.3, p<.01). The same was the case for Catholics, who also had increased odds for cholesterol screenings (OR=1.9, p<.01) and prostate screenings (OR=2.2, p<.05). | A very important role of religion in one's life was associated with a higher probability of cholesterol screening (OR=1.8, p<.01), pap smear (OR=2.0, p<.05) and prostate screening (OR=1.8, p<.05). |  |
| **Benjamins (2005)**3  **United States** | Catholic; Mainline Protestant; Evangelical Protestant; Jewish; other; none | rated on a three-point scale | never; 1-2 times/year or more; 2-3 times/month; once/week; more than one time per week | having undergone a cholesterol screening during the last two years | longitudinal (three waves, 1992-1996) | Health and Retirement Survey | n=7,866 | M=55.7 SD=3.1 51-61 | 54% | Logistic regression revealed that Mainline Protestants had significantly increased odds of cholesterol screening (OR=1.2, p<.05). | Religious salience was not a significant predictor. | Going to church was linked to an increased likelihood of cholesterol screenings (e.g., 1-2 times/year or more: OR=1.3, p<.05). |
| **Benjamins (2006)**4  **United States** | Catholic; Mainline Protestant; Evangelical Protestant; Jewish; other; none | rated on a three-point scale | never; 1-2 times/year or more; 2-3 times/month; once/week; more than one time per week | having undergone a mammogram, pap smear or self-breast examination during the last two years | longitudinal (three waves, 1992-1996) | Health and Retirement Survey | n=4,253 | M=55.7 SD=3.1 51-61 | 100.0% | Logistic regression revealed that Mainline Protestants had an increased probability of mammograms (OR=1.4, p<.01) and pap smears (OR=1.2, p<.05). Jewish individuals had higher odds of undergoing pap smears (OR=2.8, p<.01). | Religious salience was positively associated with the use of self-breast exams (e.g., very important: OR=1.3, p<.05). | Regarding mammogram, religious attendance was related to higher chances of mammograms (e.g., 1-2 times/year or more: OR= 1.4, p<.01), no matter which frequency. People who went to religious events at least 2-3 times/month or even more often had an increased probability of taking pap smears 2-3 Times/month (e.g., 2-3 times per month: OR=1.5, p<.001). Among self-breast exams, only people who attended services 1-2 times per year or more (OR: 1.3, p<.05) or 2-3 times per month (OR: 1.5, p<.001) had increased chances of an uptake. |
| **Benjamins (2007)**5  **Mexico** |  | rated on a three-point scale | (1) church attendance: no; yes (2) religious activities: never; sometimes; weekly or more often | having undergone a cholesterol screening during the last two years | longitudinal (two waves, 2001-2003) and cross-sectional | Mexican Health and Aging Study | n=9,890 | M=61.6 SD not reported ≥50 | 56% |  | According to logistic regression, religious salience was associated with increased levels of cholesterol screening utilization (OR=1.6, 95% CI: 1.3-2.0). | Attending religious services weekly or more often was related to an increased probability of taking cholesterol screenings (OR=1.3, 95% CI: 1.1-1.5). |
| **Benjamins (2011)**6  **United States** |  | religious beliefs related to health: two items | (1) church attendance: monthly or less; nearly weekly; weekly (2) congregational support: church-based health activites; health-related discussions with church members; church support for healthy lifestyle; health providers within church network | (1) having undergone a cholesterol test during the last two years  (2) having ever undergone a colonoscopy | longitudinal (two waves, 2005-2007) | national panel survey conducted among individuals affiliated with the Presbyterian Church | n=1,076 | M=59.8 SD=13.5 18-96 | 57% |  | According to logistic regression, religious salience was associated with increased levels of cholesterol screening utilization (OR=1.6, 95% CI: 1.3-2.0). | Church attendance was not significantly associated with cancer screening utilization.  Church-based health activities were related to increased likelihoods of cholesterol screening (OR: 1.1, p<.05). Health-related discussions with church members were linked to higher odds of cholesterol screening utilization (OR: 1.2, p<.05). |
| **Christman (2014)**7  **United States** |  | intrinsic religiousness: Duke Religion Index (three items) |  | having undergone prostate screening during the last year | cross-sectional | men of African descent, recruited from three large African American churches in Los Angeles | n=481 | M=49.9 SD=7.6 40-70 | 0.0% |  | Regarding zero-order correlations, intrinsic religiousness was not associated with prostate screening. |  |
| **Dutta (2018)**8  **Kenya** | Catholic; Protestant or other Christian; Muslim; none |  |  | ever having undergone cervical screening | cross-sectional | Kenya Demographic Health Survey | n=3,222 | M=32.1 SD not reported 15-45 | 100.0% | According to multivariate logistic regression, being Muslim was linked to a decreased probability of cervical screening (OR=0.2, 95% CI: 0.1-0.4). |  |  |
| **Fox (1998)**9  **United States** |  | religiosity (dichotomous) | (1) being active in church (no; yes), frequency of church attendance of oneself and one's partner (no; yes)  (2) having a church health committee (no; yes), and whether breast cancer is a top priority for the church health committee (no; yes) | having undergone a mammogram during the last two years and the two years before that, too, or a clinical breast examination during the last two years | cross-sectional | female church members from 45 churches in Los Angeles | n=1,517 | age groups: 50-64: 57% 65-80: 58% | 100.0% |  | In the bivariate analysis, religiosity was related to increased levels of mammogram (p<.05) and clinical breast examination utilization (p<.05). | According to logistic regression, being active in church was not related to any screening. Neither of the church attendance items was significant as well. While the existence of a church health committee was not significant, bivariate analysis showed that a top priority of breast cancer was related to decreased rates of clinical breast examinations (p<.05) and mammogram (p<.01). |
| **Katz (2008)**10  **United States** | Baptist; Holiness; Methodist; other; none | spirituality (three-point scale) | low; moderate; high | having undergone a mammogram during the last year | cross-sectional | Robeson County Outreach, Screening, and Education Project | n=851 | age groups: 40-49: 42.7% 50-59: 28.1% 60-69: 16.2% 70-79: 10.5% ≥80: 2.6% | 100.0% | Regarding bivariate analysis, religious affiliation was not significantly related to the uptake of mammograms. | Spirituality was not significantly associated with mammograms. | Church attendance was not significantly linked to mammogram screening utilization. |
| **Kretzler (2020)**11  **Germany** |  |  | less often; several times a year; one to three times a month; once a week; several times a week | having undergone a cancer screening during the last years | cross-sectional | German Aging Survey | n=7,043 | M=64.2 SD=11.1 40-95 | 50.6% |  |  | According to logistic regression, among Catholics, going to church once a week (OR=2.4, 95% CI: 1.6-3.6), one to three times a month (OR=2.4, 95% CI: 1.6-3.6), several times a year (OR=1.8, 95% CI: 1.2-2.6) and less often (OR=1.5, 95% CI: 1.1-2.2) was associated with higher cancer screening utilization. Among Protestants and Undenominationals, there were no significant associations. |
| **Leyva (2015)**12  **United States** |  |  | never; once or twice a month; a few times a year; weekly | having undergone a pap test during the last three years (women aged 39 and younger), a mammogram during the last two years (women aged 40 and older) or either a Fecal Occult Blood Test during the last year or an endoscopy during the last five years | cross-sectional | National Cancer Institute’s 2005 Health Information National Trends Survey | n=5,102 | M=52.2 SD=17.9 range not reporter | 66% |  |  | Regression analysis revealed that religious attendance was associated with increased levels of mammogram uptake (ß=.7, p<.001) and colorectal screening (ß=.4, p<.01). |
| **Lofters (2018)**13  **Canada** |  | being faith-driven (derived from principal components analysis) |  | ever having undergone a pap test and undergoing a pap test at least once every three years | cross-sectional | women living in Ontario | n=615 | age groups: 21-30: 17.6% 31-40: 25.0% 41-50: 23.6% 51-60: 20.8% 61-69: 13.0% | 100.0% |  | Two-sided bivariate analysis showed that being faith driven was related to a decreased probability of ever having undergone a pap test (p<.05) and undergoing a pap test at least once every three years (p<.05). |  |
| **McFall (2008)**14  **United States** |  |  | no; yes | having undergone breast screening (women) or prostate screening (men) during the last two years | longitudinal (three waves, 1994-2000) | Longitudinal Study on Aging II | n=4,419 | M=74.6 SD not reported 70-85 | 64.4% |  |  | Weighted multiple logistic regression states that attending church services is related to an increased probability of prostate screening (OR=1.6, 95% CI: 1.2-2.2). |
| **Melvin (2016)**15  **United States** |  | Multi-Dimensional Cultural Values Assessment Tool (three items) |  | having undergone a mammography during the last year | cross-sectional | women aged 18 and older who identified themselves as Hispanic Black, non-Hispanic White, or Hispanic | n=550 | M=53.4 SD=9.3 40-75 | 100.0% |  | Looking at the logistic regression, religiosity was related to an increased probability of not taking a mammography (OR=1.4, 95% CI: 1.0-2.0). |  |
| **Miller (1993)**16  **United States** | Catholic; Protestant |  |  | having undergone a mammography during the last two years | cross-sectional | women belonging to four churches in a large midwestern metropolitan area | n=161 | M=63 SD not reported 50-89 | 100.0% | Being Catholic was related to an increased probability of breast cancer screening (OR=5.7, p<.05), according to logistic regression. |  |  |
| **Mitchell (2002)**17  **United States** |  | rating whether religious interventions can promote cancer treatment (dichotomous) or even replace cancer treatment (dichotomous) |  | having undergone a mammography or a clinical breast examination during the last year and whether women intend to delay seeking treatment of a self-detected breast lump | cross-sectional | women from two eastern North Carolina counties | n=682 | M=60.3 SD=13.1 40-99 | 100.0% |  | Regarding multiple logistic regression, thinking that religious interventions can promote cancer treatment was associated with an increased likelihood of undergoing mammograms (OR=1.1, p<.05). Thinking that religious interventions can replace cancer treatment was linked in an increased probability of delaying seeking for treatment (OR=1.2, p<.01). |  |
| **Murray (1993)**18  **United Kingdom** | Catholic; Presbyterian; Methodist; Presbyterian |  |  | performing breast self-examination (dichotomous) and passively or actively attending for smears | cross-sectional | community survey of public attitudes to cancer which was conducted among Northern Ireland women | n=1,162 | age groups: <35: 37% 35-54: 29% >55: 34% | 100.0% | Logistic regression revealed that members of the Church of Ireland had an increased probability to perform breast self-examination (OR=1.5, 95% CI: 1.1-2.1), compared to Catholics. Regarding passively attending smears, Methodists were more likely to do that (OR=1.8, 95% CI: 1.0-3.0), compared to Catholics. Members of the Church of Ireland (OR=2.3, 95% CI: 1.4-3.9), Presbyterians (OR=1.6, 95% CI: 1.0-2.6) and Methodists (OR=3.1, 95% CI: 1.8-5.4) were more likely to actively attend smears than Catholics. |  |  |
| **O'Reilly (2013)**19  **United Kingdom** | Catholic; Protestant; none |  |  | having undergone a breast screening during the last three and a half years | longitudinal (two waves, 2001-2004) | Northern Ireland Longitudinal Study | n=37,211 | age groups: <55: 46.2% 55-64: 53.8% | 100.0% | According to multivariate logistic regression, Protestants had an increased probability of breast screening uptake (OR=1.1, 95% CI: 1.1-1.2), while people who were neither Catholic nor Protestant had a decreased likelihood (OR=0.8, 95% CI: 0.7-0.8). |  |  |
| **Rimande-Joel (2019)**20  **Nigeria** | Christian; Muslim; other |  |  | undergoing cervical cancer screening practice | cross-sectional | women residing in Taraba State, North-East Nigeria | n=978 | age groups: 16-30: 37.2% 31-45: 43.8% >45: 19.0% | 100.0% | Chi-square analysis showed that the likelihood of practicing cervical cancer screening was highest among Muslims, second highest among Christians, and lowest among members of other religions (p<.001). |  |  |
| **Salmoirago-Blotcher (2011)**21  **United States** |  |  | not at all; less than once; once a week; more than once | ever having undergone a mammogram, a breast self-examination, or a pap smear | cross-sectional | Women’s Health Initiative observational study | n=56,372 | M=62.0 SD=7.1 range not reporter | 100.0% |  |  | Logistic regression found out that any religious service attendance was associated with a higher likelihood of mammograms (e.g., once a week: OR=1.4, 95% CI: 1.3-1.6) and breast self-examinations (e.g., once a week: OR=1.3, 95% CI: 1.2-1.5). Going to church once a week was related to increased chances of pap smear use (OR: 1.2, 95% CI: 1.0-1.5). |
| **Sen (2016)**22  **United States** |  | (1) religiosity: rated on a three-point scale (2) religious locus of control: passive; collaborative; internal | never; less than weekly; once a week; more than weekly | having undergone a mammogram during the last two years | longitudinal | National Survey of Midlife Development in the United States | n=474 | M=57.3 SD=10.5 range not reported | 100.0% |  | Regarding logistic regression, neither religiosity nor religious locus of control were related to mammogram utilization. | Religious attendance was not associated with mammogram use. |
| **Tapera (2019)**23  **Zimbabwe** | Catholic; Protestant; Pentecostal; Apostolic sect; other |  |  | ever having undergone a cervical cancer screening | cross-sectional | healthy women from Harare | n=42 | age groups: 25-34: 50% 35-44: 19% 45-54: 29% ≥55: 2% | 100.0% | According to logistic regression, women who were Roman Catholic (OR=0.0, 95% CI: 0.0-0.3), Protestant (OR=0.0, 95% CI: 0.0-0.5), Pentecostal (OR=0.0, 95% CI: 0.0-0.1) or belonged to an Apostolic sect (OR=0.0, 95% CI: 0.0-0.9) were less likely to attend cervical cancer screenings. |  |  |
| **Van Ness (2002)**24  **United States** | Catholic; Protestant; Jewish; Pentecostal; none |  | no; yes | having undergone a mammogram during the last three years or a breast examination by a doctor during the last two years | cross-sectional | women diagnosed with a first primary breast cancer in Connecticut | n=322 | M=55.3 SD=12.3 range not reported | 100.0% | Multivariate logistic regressions states that there was no significant association between the religious denomination and breast cancer screening attendance. |  | Among Whites, people who attended religious services at least once a week had a higher likelihood to practice breast cancer screening (OR=2.6, 95% CI: 1.1-6.1). |
| **Wong (2013)**25  **Malaysia** | Christian; Muslim; Buddhist; Hinduist; other |  |  | ever having undergone a pap smear | cross-sectional | women living in Petaling Jaya city | n=229 | Median: 46 Interquartile range: 37-53 | 100.0% | Regarding Poisson regression, being Christian (OR=1.4, 95% CI: 1.0-1.8) or Buddhist (OR=1.4, 95% CI: 1.0-1.8) was associated with an increased probability of having undergone a pap smear. |  |  |
| **Yeo (2018)**26  **Singapore** | Muslim; Buddhist; other |  |  | ever having undergone a pap smear | cross-sectional | postnatal women | n=268 | age groups: 21-34: 77.9% 35-50: 22.1% | 100.0% | Looking at Pearson's correlation, religion was found to be significantly associated with pap smear uptake. Buddhists had an increased likelihood, while Muslims had a lower one. |  |  |
| **Yi (1994)**27  **United States** | Catholic; Protestant; Buddhist; none |  |  | ever having undergone a pap smear | cross-sectional | Vietnamese women who integrated into the United States | n=141 | age groups: 18-24: 34.8% 25-34: 22.0% 35-44: 16.3% 45-54: 19.1% ≥55: 7.8% | 100.0% | Regarding bivariate analysis, religion was a significant correlate of pap smear screenings. Christians and non-religious people had a higher probability, Buddhists a lower one. |  |  |

1. Azaiza F, Cohen M, Awad M, Daoud F. Factors associated with low screening for breast cancer in the Palestinian Authority: relations of availability, environmental barriers, and cancer-related fatalism. Cancer 2010;116(19):4646-55.

2. Benjamins MR, Brown C. Religion and preventative health care utilization among the elderly. Social Science & Medicine 2004;58(1):109-118.

3. Benjamins MR. Social determinants of preventive service utilization: how religion influences the use of cholesterol screening in older adults. Research on Aging 2005;27(4):475-497.

4. Benjamins MR. Religious influences on preventive health care use in a nationally representative sample of middle-age women. J Behav Med 2006;29(1):1-16.

5. Benjamins MR. Predictors of preventive health care use among middle-aged and older adults in Mexico: the role of religion. J Cross Cult Gerontol 2007;22(2):221-34.

6. Benjamins MR, Ellison CG, Krause NM, Marcum JP. Religion and preventive service use: do congregational support and religious beliefs explain the relationship between attendance and utilization? J Behav Med 2011;34(6):462-76.

7. Christman LK, Abernethy AD, Gorsuch RL, Brown A. Intrinsic religiousness as a mediator between fatalism and cancer-specific fear: clarifying the role of fear in prostate cancer screening. J Relig Health 2014;53(3):760-72.

8. Dutta T, Haderxhanaj L, Agley J, Jayawardene W, Meyerson B. Association Between Individual and Intimate Partner Factors and Cervical Cancer Screening in Kenya. Prev Chronic Dis 2018;15:E157.

9. Fox SA, Pitkin K, Paul C, Carson S, Duan N. Breast cancer screening adherence: does church attendance matter? Health Educ Behav 1998;25(6):742-58.

10. Katz ML, Kauffman RM, Tatum CM, Paskett ED. Influence of church attendance and spirituality in a randomized controlled trial to increase mammography use among a low-income, tri-racial, rural community. J Relig Health 2008;47(2):227-36.

11. Kretzler B, König HH, Hajek A. Religious Attendance and Cancer Screening Behavior. Front Oncol 2020;10:583925.

12. Leyva B, Nguyen AB, Allen JD, Taplin SH, Moser RP. Is religiosity associated with cancer screening? Results from a national survey. J Relig Health 2015;54(3):998-1013.

13. Lofters AK, Vahabi M, Pyshnov T, Kupets R, Guilcher SJT. Segmenting women eligible for cervical cancer screening using demographic, behavioural and attitudinal characteristics. Prev Med 2018;114:134-139.

14. McFall SL, Davila M. Gender, social ties, and cancer screening among elderly persons. Journal of Aging & Health 2008;20(8):997-1011.

15. Melvin CL, Jefferson MS, Rice LJ, Cartmell KB, Halbert CH. Predictors of Participation in Mammography Screening among Non-Hispanic Black, Non-Hispanic White, and Hispanic Women. Front Public Health 2016;4:188.

16. Miller AM, Champion VL. Mammography in women > or = 50 years of age. Predisposing and enabling characteristics. Cancer Nurs 1993;16(4):260-9.

17. Mitchell J, Lannin DR, Mathews HF, Swanson MS. Religious beliefs and breast cancer screening. J Womens Health (Larchmt) 2002;11(10):907-15.

18. Murray M, McMillan C. Social and behavioural predictors of women's cancer screening practices in Northern Ireland. J Public Health Med 1993;15(2):147-53.

19. O'Reilly D, Kinnear H, Rosato M, Mairs A, Hall C. Uptake of breast screening is influenced by current religion and religion of upbringing. J Relig Health 2013;52(4):1168-76.

20. Rimande-Joel R, Ekenedo GO. Knowledge, Belief and Practice of Cervical Cancer Screening and Prevention among Women of Taraba, North-East Nigeria. Asian Pac J Cancer Prev 2019;20(11):3291-3298.

21. Salmoirago-Blotcher E, Fitchett G, Ockene JK, Schnall E, Crawford S, Granek I, et al. Religion and healthy lifestyle behaviors among postmenopausal women: the women's health initiative. J Behav Med 2011;34(5):360-71.

22. Sen CK, Kumkale GT. Who does not get screened? A simple model of the complex relationships in mammogram non-attendance. J Health Psychol 2016;21(12):2838-2850.

23. Tapera O, Kadzatsa W, Nyakabau AM, Mavhu W, Dreyer G, Stray-Pedersen B, et al. Sociodemographic inequities in cervical cancer screening, treatment and care amongst women aged at least 25 years: evidence from surveys in Harare, Zimbabwe. BMC Public Health 2019;19(1):428.

24. Van Ness PH, Kasl SV, Jones BA. Are Religious Women More Likely to Have Breast Cancer Screening? J Relig Health 2002;41(4):333-346.

25. Wong YL, Chinna K, Mariapun J, Wong LP, Khoo EM, Low WY, et al. Correlates between risk perceptions of cervical cancer and screening practice. Prev Med 2013;57 Suppl:S24-6.

26. Yeo C, Fang H, Thilagamangai, Koh SSL, Shorey S. Factors affecting Pap smear uptake in a maternity hospital: A descriptive cross-sectional study. J Adv Nurs 2018;74(11):2533-2543.

27. Yi JK. Factors associated with cervical cancer screening behavior among Vietnamese women. J Community Health 1994;19(3):189-200.
